# Supplementary material
Source: PubMed Central journal article supplement (PMC5770556)
Supplement: mmc1.pdf [file mmc1.pdf]

**Biophysical Journal, Volume 113**

**Supplemental Information**

**Atomistic Insights into Structural Differences between E3 and E4 Isoforms of Apolipoprotein E**

**Angana Ray, Navjeet Ahalawat, and Jagannath Mondal**

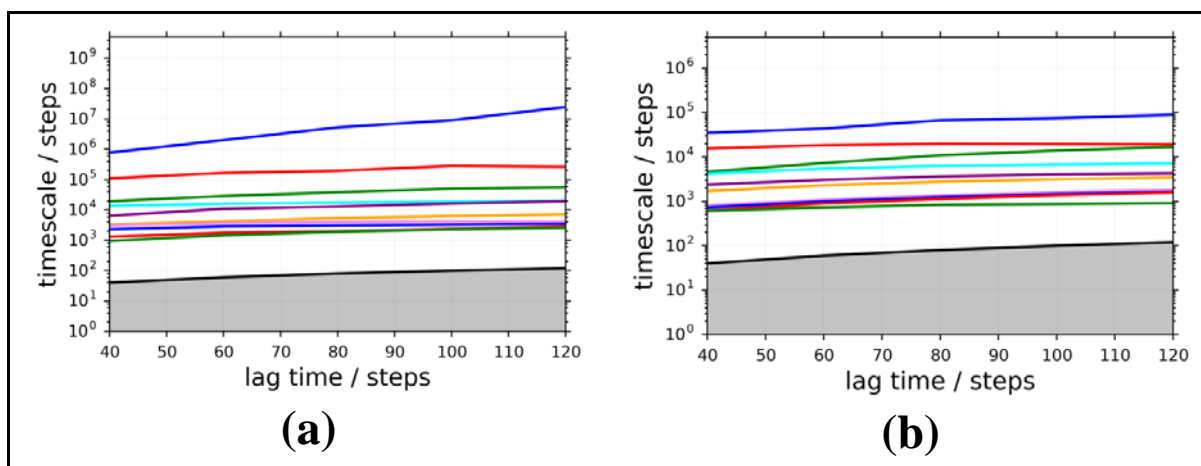

**Fig S1.** The 10 slowest implied timescales plotted on a log scale as a function of lag time for ApoE isoforms. The trajectory step size is 10 ps. The lag time chosen for all analysis in the main text was 1 ns (100 steps), as the implied time scale leveled off at about 1 ns which ensure the Markovianity of model in (a) ApoE3 and (b) ApoE4.

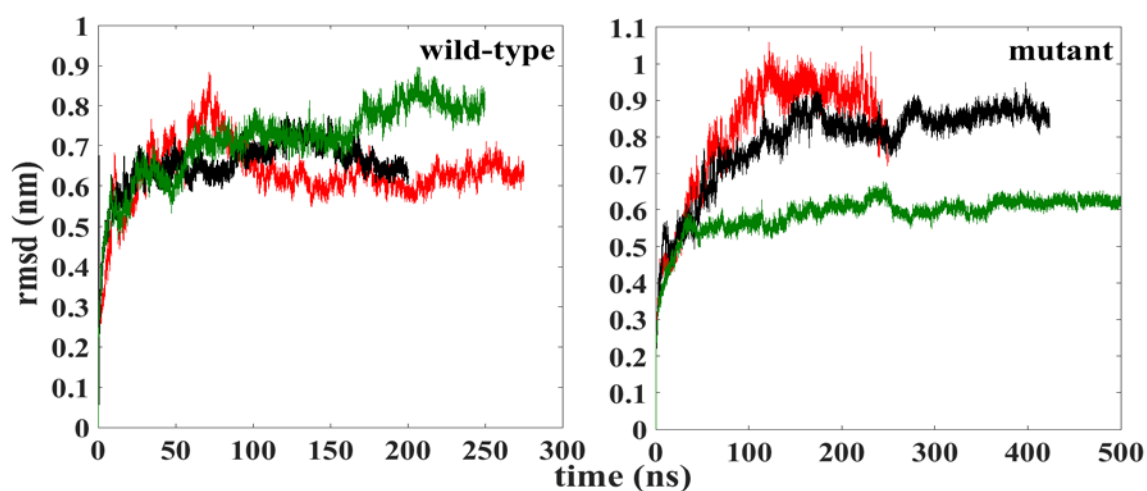

**Fig S2.** Time evolution plots for RMSD of ApoE3 and ApoE4 (L to R). The three colors indicate three different MD-runs. First 100ns is considered as the equilibration time in each run.

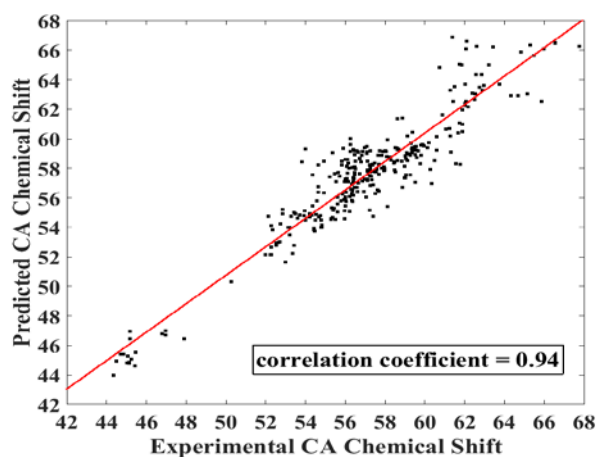

**Fig S3.** Correlation between the calculated and experimental chemical shift for C- $\alpha$  atoms of ApoE3.

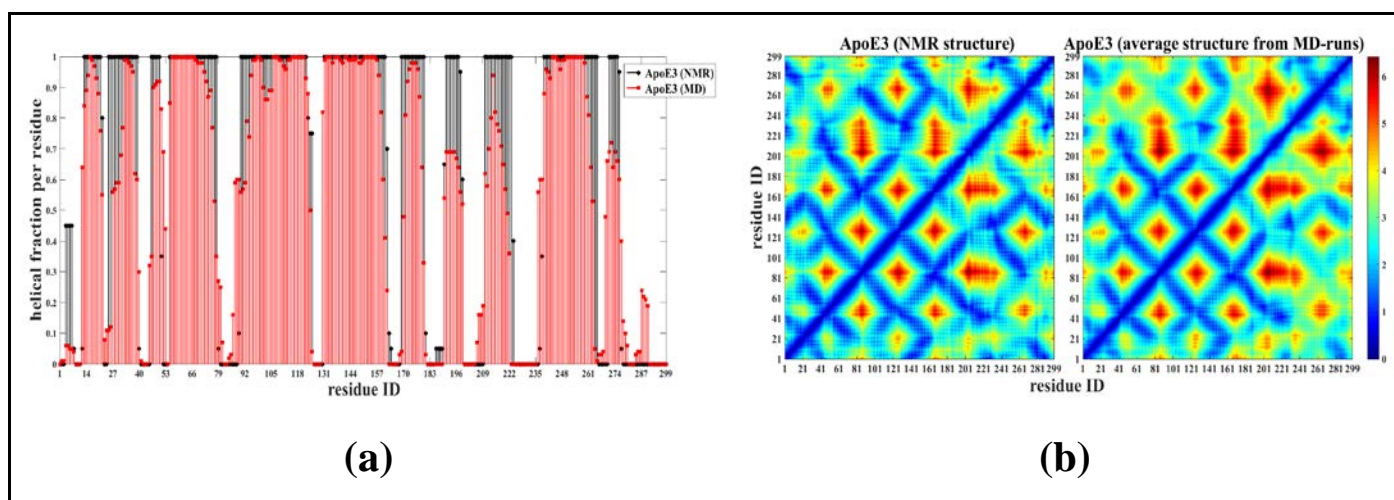

**Fig. S4. Difference between ApoE3 NMR structure and MD-run average structure.**  
 (a) Secondary Structure and (b) Contact map plot of ApoE3 NMR ensemble-average structure (black) and MD-run average ApoE3 structure

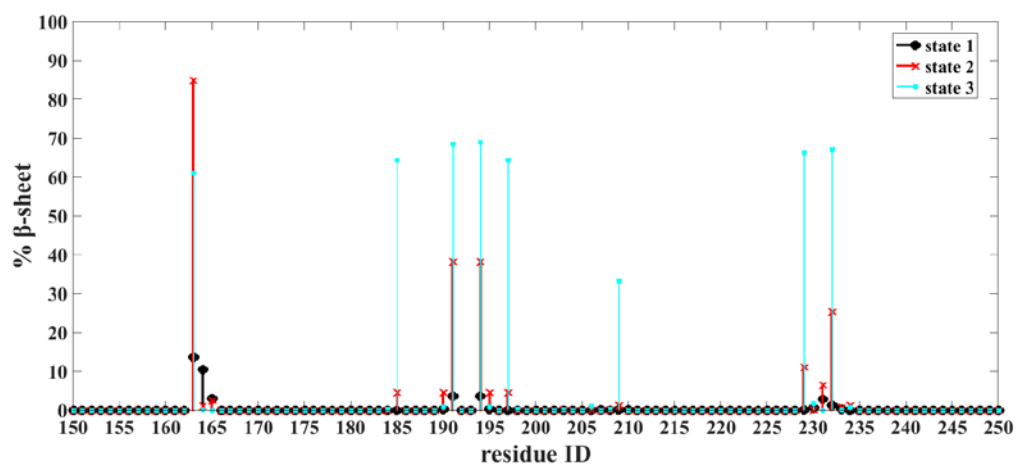

(a)

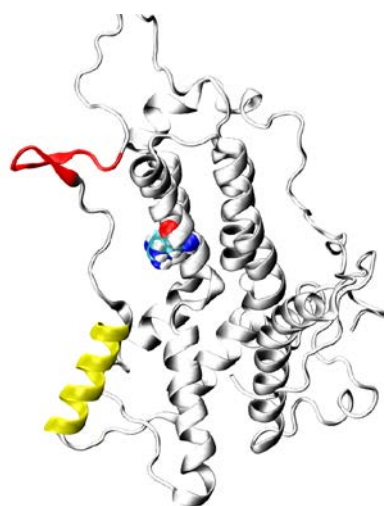

(b)

**Fig S5.  $\beta$ -sheet content of three ApoE4 macrostates obtained from MSM.**

(a) Per residue %  $\beta$ -sheet of ApoE4 macrostates. Residues 190-200 (hinge helix 2 region) have higher  $\beta$ -sheet propensity in macrostate 2 and 3. (b) a snapshot from MD-run of ApoE4 where, this  $\beta$ -sheet formation is visible.

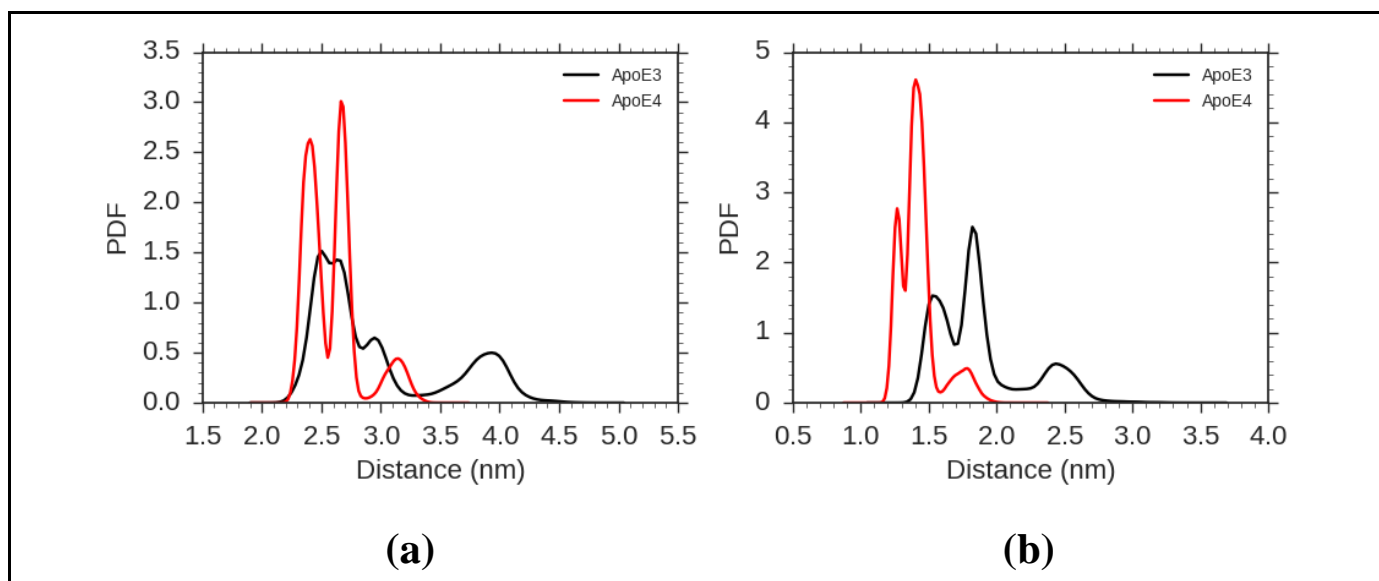

**Fig. S6. Proximity of helix C2 to helix 2/helix 4.**

Frequency histogram for distances calculated from center of masses of (a) helix 2 and (b) helix 4 of N-terminal domain to center of mass of helix C2

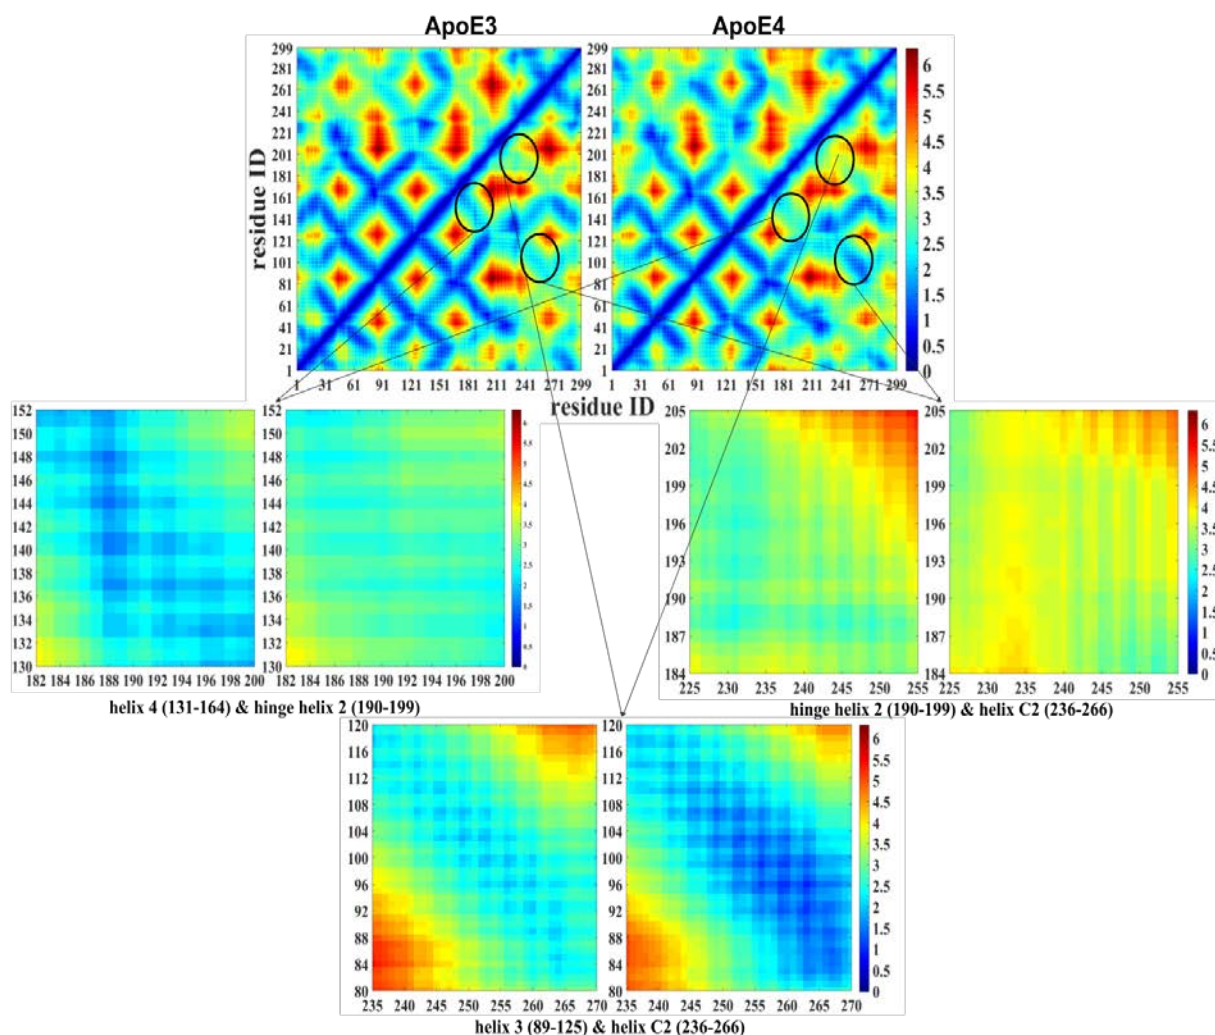

**Fig. S7. Contact map plot for ApoE3 and ApoE4**

On top is overall contact map for ApoE3 and ApoE4 isoforms obtained on the basis of their respective time-averaged structures. The residues of helix 3 (89-125) and helix C2 (236-266) are far apart in ApoE3, whereas the same region comes in close proximity during MD-run of ApoE4. The helix 4 (residues 131-164) and residues 130-164 (hinge helix 1 and hinge helix 2) are closer in ApoE3 but far apart in ApoE4. The segments forming hinge helix 2 (residues 190-199) and helix C1 (residues 210-223) also are closer in ApoE3 but slightly away from each other in ApoE4.

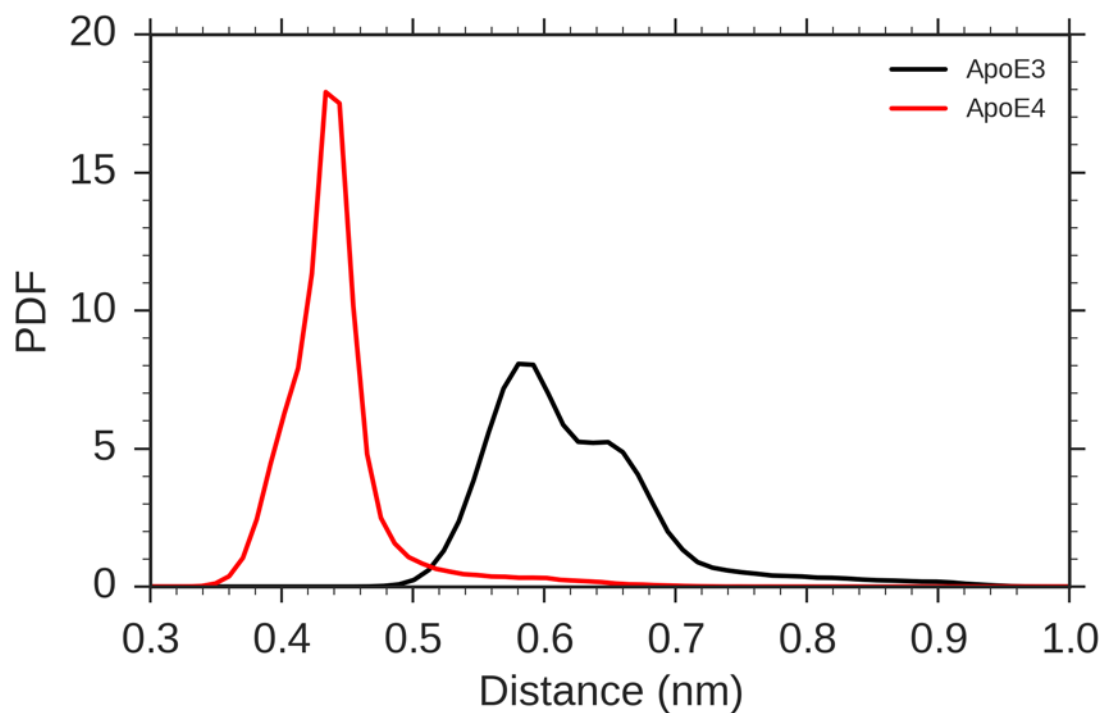

**Fig. S8. Distance between residues 112 and 109 of ApoE isoforms (ApoE3 and ApoE4)**

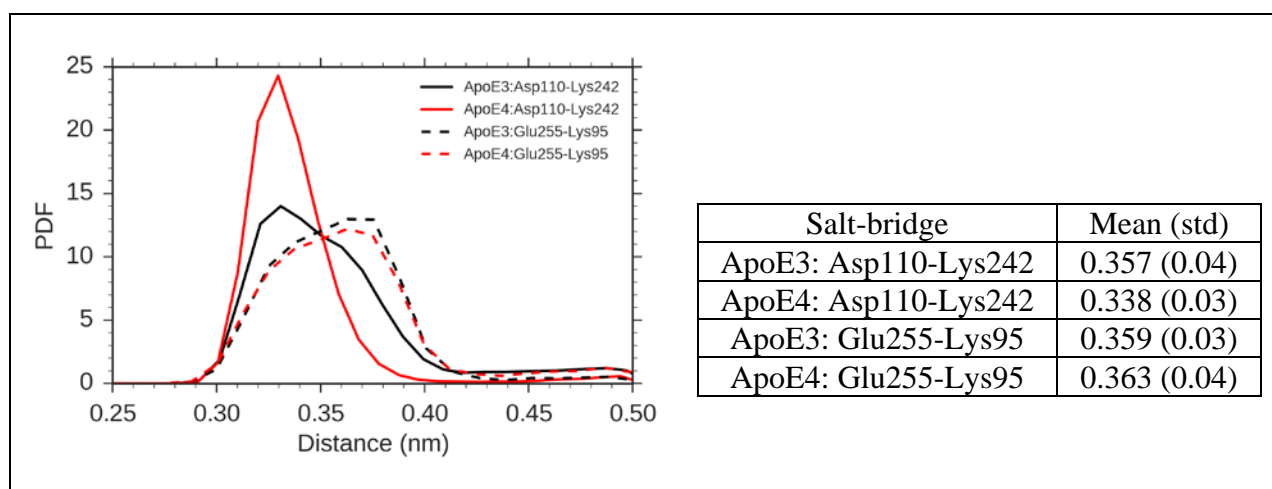

**Fig. S9. Donor...Acceptor distances in salt bridges Lys95-Glu255 and Asp110-Lys242 in ApoE3 and ApoE4.**

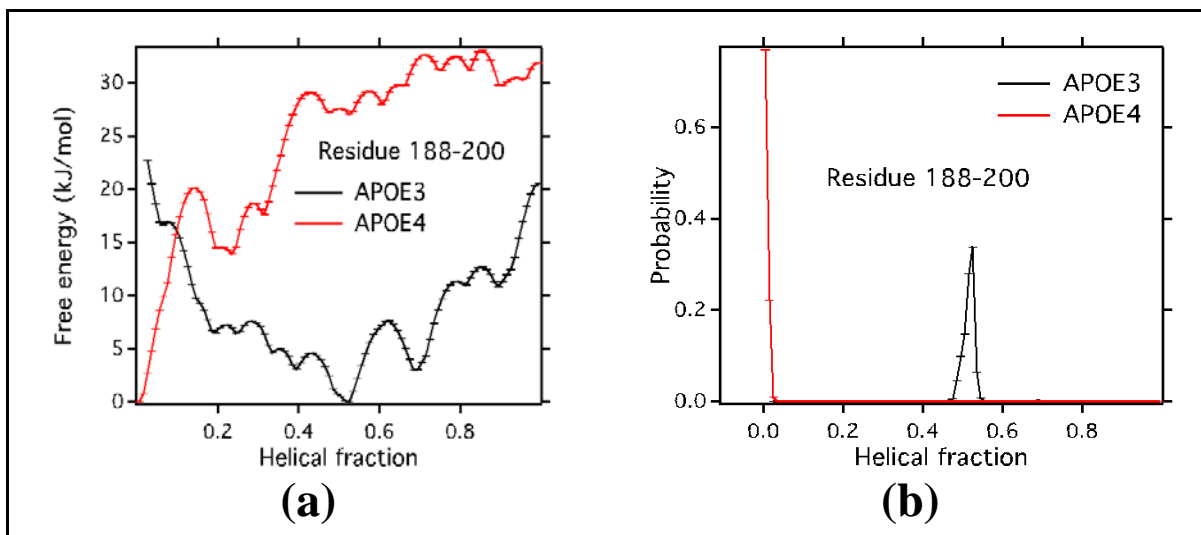

**Fig. S10. Comparative free energy profiles of ApoE isoforms**

(a) free energy profile for ApoE3 and ApoE4 isoforms. (b) The probability vs. helical fraction plot for ApoE isoforms.



### Fig. S11. Sequence of hinge helix 2 and helix 3 of ApoE4

The sequence of hinge helix 2 is:

190 VAL  
191 ARG  
**192 ALA**  
**193 ALA**  
194 THR  
195 VAL  
196 GLY  
197 SER  
198 LEU  
199 ALA

The Sequence of helix 3 is

89 THR  
90 ARG  
91 ALA  
92 ARG  
93 LEU  
94 SER  
95 LYS  
96 GLU  
97 LEU  
98 GLN  
99 ALA  
100 ALA  
101 GLN  
102 ALA  
103 ARG  
104 LEU  
105 GLY  
106 ALA  
107 ASP  
108 MET  
109 GLU (forms salt bridge with 112 ARG)  
110 ASP  
111 VAL  
112 ARG (mutation point)  
113 GLY  
114 ARG  
115 LEU  
116 VAL  
117 GLN  
118 TYR  
119 ARG  
120 GLY  
121 GLU  
122 VAL  
123 GLN  
124 ALA  
125 MET

The 112th residue (ARG of ApoE4) is mutation point. The residues 105 GLY and 106 ALA have the lowest (1 kcal/mol) and highest (0 kcal/mol) helical propensities respectively. The residue 107 ASP has low helical propensity of 0.69 kcal/mol whereas 108 MET has comparatively higher helical propensity of 0.24 kcal/mol. This is in-line with our observation that the helix bending occurs at the middle of helix 3 and residue 107 loses its helicity. Also, in ApoE4, 112 ARG forms salt-bridge with 109 GLU, so 112 ARG may not be having close interactions with residues of hinge helix 2, unlike ApoE3, where 112 CYS interacts with 192 ALA and 193 ALA of hinge helix 2.

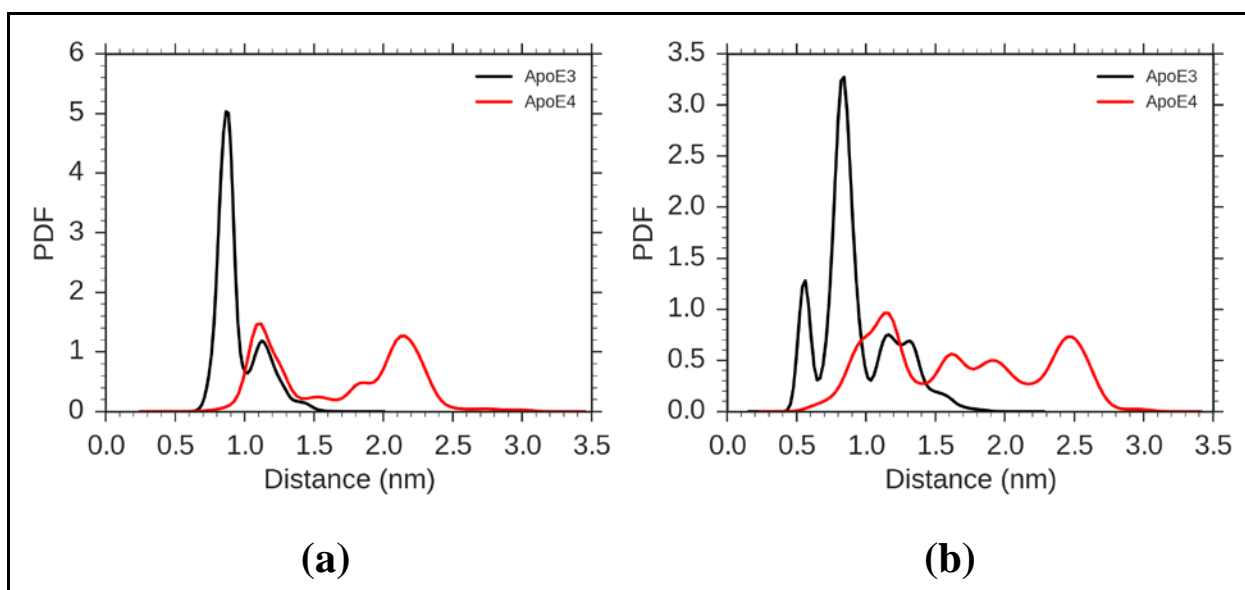

**Fig. S12. Frequency distribution of (a) Cys/Arg112-Ala192 and (b)Cys/Arg112-Ala193 distance.**
